# Supplementary material for: Oral primary care: an analysis of its impact on the incidence and mortality rates of oral cancer
Source: BMC Cancer. 2017 Oct 30;17:706. doi: 10.1186/s12885-017-3700-z (PMC5661925; doi:10.1186/s12885-017-3700-z)
Supplement: Additional file 1: — Description of indicators (context, structure, process and outcome) and databases sources. Extension: .pdf. This file contain a full description of variables, as well as the data sources used to gather secondary information for the article. (PDF 209 kb) [file 12885_2017_3700_MOESM1_ESM.pdf]

**Additional file 1. Description of indicators (context, structure, process and outcome) and databases sources**

| Indicators                                                                                                                                                                                                                                         | Source                   | Available years | Disaggregation level                                                                                                                                                                                          |
|----------------------------------------------------------------------------------------------------------------------------------------------------------------------------------------------------------------------------------------------------|--------------------------|-----------------|---------------------------------------------------------------------------------------------------------------------------------------------------------------------------------------------------------------|
| Socioeconomic and demographic                                                                                                                                                                                                                      |                          |                 |                                                                                                                                                                                                               |
| GINI index                                                                                                                                                                                                                                         | IBGE                     | 2000 to 2012    | Federative unit                                                                                                                                                                                               |
| Average per capita household income (sum of the monthly income of the household residents (Reals) divided by the number of inhabitants)                                                                                                            | IBGE                     | 2000 to 2012    |                                                                                                                                                                                                               |
| Proportion of elderly population (Number of people aged 60 or over divided by the total population)                                                                                                                                                | IBGE                     | 2002 to 2012    |                                                                                                                                                                                                               |
| Male/female ratio (Number of male inhabitants divided by the number of female inhabitants)                                                                                                                                                         | IBGE                     | 2002 to 2012    |                                                                                                                                                                                                               |
| Proportion of adult smokers (Number of people aged 18 and over who currently smoke divided by the total number of adults)                                                                                                                          | VIGITEL                  | 2007 to 2011    | Federative unit capitals                                                                                                                                                                                      |
| BHU structure                                                                                                                                                                                                                                      |                          |                 |                                                                                                                                                                                                               |
| Average proportion of dental equipment (Number of minimum items in BHU, divided by the total BHU of the BFU - 8 items in 2002; 13 in 2008; 9 in 2012/13) – dental chair, seat, equipo, reflector, auxiliary unit, compressor and autoclave / stove | <i>1° PHC monitoring</i> | 2002            | <i>1° PHC monitoring</i><br>13,495 BHU/<br>13,973 FHST/<br>2,841 OHT<br><br><i>2° PHC monitoring</i><br>1,875 BHU<br>2,133 FHST<br>1,858 OHT<br><br><i>PMAQ-AB</i><br>38,818 BHU<br>17,202 FHST<br>12,403 OHT |
|                                                                                                                                                                                                                                                    | <i>2° PHC monitoring</i> | 2008            |                                                                                                                                                                                                               |
|                                                                                                                                                                                                                                                    | <i>PMAQ-AB</i>           | 2012/13         |                                                                                                                                                                                                               |
| Average proportion of dental clinical examination instruments (Number of minimum items in BHU, divided by the total BHU of the SU - 3 items: mirror, tweezers and explorer probe)                                                                  | <i>1° PHC monitoring</i> | 2002            |                                                                                                                                                                                                               |
|                                                                                                                                                                                                                                                    | <i>2° PHC monitoring</i> | 2008            |                                                                                                                                                                                                               |
|                                                                                                                                                                                                                                                    | <i>PMAQ-AB</i>           | 2012/13         |                                                                                                                                                                                                               |
| Average proportion of individual protection equipment (IPE) inputs (Number of minimum items in BHU, divided by the total BHU - 5 items: gloves, masks, caps, glasses and apron)                                                                    | <i>1° PHC monitoring</i> | 2002            |                                                                                                                                                                                                               |
|                                                                                                                                                                                                                                                    | <i>2° PHC monitoring</i> | 2008            |                                                                                                                                                                                                               |
|                                                                                                                                                                                                                                                    | <i>PMAQ-AB</i>           | 2012/13         |                                                                                                                                                                                                               |
| Proportion of full teams (Number of OHT composed of at least 1 dentist and 1 advanced dental hygiene practitioner (ADHP) or 1 dental hygiene practitioner (DHP)                                                                                    | <i>1° PHC monitoring</i> | 2002            |                                                                                                                                                                                                               |
|                                                                                                                                                                                                                                                    | <i>2° PHC monitoring</i> | 2008            |                                                                                                                                                                                                               |
|                                                                                                                                                                                                                                                    | <i>PMAQ-AB</i>           | 2012/13         |                                                                                                                                                                                                               |
| Proportion of dentist with no precarious bond work (Number of OHT where dentist has legally protected work link, divided by the total OHT)                                                                                                         | <i>1° PHC monitoring</i> | 2002            |                                                                                                                                                                                                               |
|                                                                                                                                                                                                                                                    | <i>2° PHC monitoring</i> | 2008            |                                                                                                                                                                                                               |
|                                                                                                                                                                                                                                                    | <i>PMAQ-AB</i>           | 2012/13         |                                                                                                                                                                                                               |

| Indicators                                                                                                                                                                                              | Source            | Available years     | Disaggregation level                    |
|---------------------------------------------------------------------------------------------------------------------------------------------------------------------------------------------------------|-------------------|---------------------|-----------------------------------------|
| Financing of primary health care (PHC) (Annual Value (R\$) of resources for PHC, divided by city population, multiplied by 1 million)                                                                   | SAGE/IBGE         | 2001 to 2012        | Federative unit                         |
| Work process of FHST and OHT                                                                                                                                                                            |                   |                     |                                         |
| FHST coverage (Average number of FHST in the year, multiplied by 3,450 people, divided by the total municipal population)                                                                               | SIAB/IBGE         | 2002 to 2012        | Municipalities                          |
| OHT coverage (Average number of OHT in the year, multiplied by 3,000 people, divided by the total municipal population)                                                                                 | SIAB/IBGE         | 2002 to 2012        |                                         |
| Coverage of first dental appointment (Amount paid for first dental visit per year, divided by the population of that year, multiplied by 100)                                                           | SIAB/IBGE         | 2000 to 2007        |                                         |
| Proportion of OHT performing preventive actions and oral cancer detection (No. of OHT performing prevention and oral cancer detection, divided by the total OHT)                                        | 1° PHC monitoring | 2002                | 13,495 BHU<br>13,973 FHST<br>2,841 OHT  |
|                                                                                                                                                                                                         | 2° PHC monitoring | 2008                | 1,875 BHU<br>2,133 FHST<br>1,858 OHT    |
|                                                                                                                                                                                                         | PMAQ-AB           | 2012/13             | 38,818 BHU<br>17,202 FHST<br>12,403 OHT |
| Average individual basic dental procedures (Annual quantity of dental procedures, divided by the population of that year)                                                                               | SIA-SUS/IBGE      | 2000 to 2006        | Federative unit                         |
| Supervised tooth brushing (Number of people participating in collective actions of supervised tooth brushing held in a certain place and period divided by the population)                              | SIA-SUS/IBGE      | 2012/13             |                                         |
| Results                                                                                                                                                                                                 |                   |                     |                                         |
| Estimated incidence rate of oral cancer (Number of estimated cases of oral cancer (ICD10: C00-C10) in the reference year, divided by the total local population in the same year multiplied by 100,000) | INCA/IBGE         | 2003, 2008 and 2012 | Federative unit                         |
| Mortality rate for oral cancer (No. of registered deaths from mouth cancer (ICD10: C00-C10) in the reference year, divided by the total local population in the same year multiplied by 100,000)        | SIM/IBGE          | 2000 to 2012        |                                         |

IBGE: Brazilian Institute of Geography and Statistics. VIGITEL: Surveillance of risk and protective factors for chronic diseases through telephone survey. BHU: Basic Health Unit. FHST: Family Health Strategy Team. OHT: Oral Health Team. BFU: Brazilian Federal Unit. PHC: Primary Health Care. SIA-SUS: Ambulatory Information System. INCA: National Cancer Institute. ICD: International Code of Diseases. SIM: Mortality Information System. IPE: individual protection equipment. SIAB: Primary Care Information System. SAGE: System for Specialized Management Support. PMAQ-AB: National Program For Improving Access and Quality on Public Primary Health Care. ADHP: Advanced Dental Hygiene Practitioner. DHP: Dental Hygiene Practitioner.
